1 **Title:** Locally-adapted *Mimulus* ecotypes differentially impact rhizosphere bacterial and archaeal  
2 communities in an environment-dependent manner

3

4 Alan W. Bowsher<sup>1,2</sup>, Patrick J. Kearns<sup>1,2</sup>, Damian Popovic<sup>3,4</sup>, David B. Lowry<sup>2,3,4,5</sup>, Ashley Shade<sup>1,2,4,5,†</sup>

5

6 1. Department of Microbiology and Molecular Genetics, Michigan State University, East Lansing, MI.

7 2. Plant Resilience Institute, Michigan State University, East Lansing, MI

8 3. Department of Plant Biology, Michigan State University, East Lansing, MI

9 4. Program in Ecology, Evolutionary Biology and Behavior, Michigan State University, East Lansing, MI

10 5. DOE Great Lakes Bioenergy Research Center, Michigan State University, East Lansing, MI

11

12 †Corresponding author: A. Shade; E-mail: shadeash@msu.edu

13

14

15

16

17

18

19

20

21

22

23

24

25

26

27 **Abstract**

28 Plant root-microbe interactions influence plant productivity, health, and resistance to stress.  
29 Although there is evidence that plant species and even genotypes can alter soil microbial community  
30 structure, environmental conditions can potentially outweigh plant genetic effects. Here, we used a  
31 reciprocal transplant experiment to understand the contributions of the environment and the host plant to  
32 rhizosphere microbiome composition in locally-adapted ecotypes of *Mimulus guttatus* (syn. *Erythranthe*  
33 *guttata* (Fisch. ex DC.) G.L. Nesom). Two genotypes of a coastal ecotype and two genotypes of an inland  
34 ecotype were planted at coastal and inland sites. After three months, we collected rhizosphere and bulk  
35 soil and assessed microbial communities by 16S rRNA gene sequencing. We found that local  
36 environment (coastal versus inland site) strongly influenced rhizosphere communities, at least in part due  
37 to distinct local microbial species pools. Host identity played a smaller role: at each site, the ecotypes  
38 exhibited remarkably similar composition of microbial communities at the class level, indicating that  
39 divergent *M. guttatus* ecotypes recruit phylogenetically similar rhizosphere communities, even in  
40 environments to which they are maladapted. Nevertheless, the two ecotypes significantly differed in  
41 community composition at the inland site due to an exclusive set of rare taxa associated with each  
42 ecotype. Although our results indicate that locally-adapted *M. guttatus* ecotypes are genetically diverged  
43 in factors shaping rhizosphere communities, environmental factors can trump genetic factors in shaping  
44 the *M. guttatus* microbiome. Overall, our findings demonstrate that wild plants strongly impact root-  
45 associated microbial communities, but hierarchical drivers interact to shape microbial community  
46 assembly outcomes.

47

48 **Keywords:** root microbiome; *Mimulus guttatus*; 16S rRNA gene; plant-microbe interactions

49

50

51

52

## 53 **Introduction**

54           The rhizosphere (the narrow zone of soil surrounding plant roots) is a highly diverse and active  
55 microenvironment. In addition to influencing soil structure, moisture, and nutrient availability (Marschner  
56 et al. 1987; Angers and Caron 1998; McKinney and Cleland 2014), plant roots continuously supply labile  
57 carbon to the soil through root exudation. These continual carbon inputs recruit a host of soil microbes to  
58 the rhizosphere (Bressan et al. 2009; Bulgarelli et al. 2012; Chaparro et al. 2014; Zhahnina et al. 2018),  
59 often resulting in distinct microbial communities compared to the surrounding bulk soil (Berendsen et al.  
60 2012; Bever et al. 2012; Philippot et al. 2013). Rhizosphere microbial communities can strongly impact  
61 plant health and productivity, altering plant morphology (Friesen et al. 2011), phenology (Wagner et al.  
62 2014), and plant resistance to both biotic (Santhanam et al. 2015; Busby et al. 2016; Ritpitakphong et al.  
63 2016) and abiotic stresses (Lau and Lennon 2011, 2012). Nevertheless, despite the critical importance of  
64 rhizosphere communities for plant productivity, the factors shaping the rhizosphere microbiome are  
65 complex and not fully understood (Berg and Smalla 2009; Lareen et al. 2016; Sasse et al. 2018).

66           One factor that can strongly influence rhizosphere community composition is plant host identity.  
67 Plant species and even genotypes within species can differ in rhizosphere community structure when  
68 planted in a common environment (Aira et al. 2010; Bouffaud et al. 2012; Edwards et al. 2015; Mahoney  
69 et al. 2017; Berg et al. 2002; Bowen et al. 2017; Fitzpatrick et al. 2018). This finding is often suggested to  
70 result, at least in part, from species-specific root exudation patterns recruiting different community  
71 members (Marschner et al. 2001). Indeed, numerous studies suggest root exudation is the primary  
72 mechanism by which plants mediate rhizosphere community assembly and function (Broeckling et al.  
73 2008; Haichar et al. 2008; Carvalhais et al. 2015; Hu et al. 2018). Other species- or genotype-specific  
74 factors could also contribute, such as differences in rooting depth (Alekkett et al. 2015) and root  
75 architecture (Pérez-Jaramillo et al. 2017), given that microbial community composition can shift with soil  
76 depth (Fierer et al. 2003; Ko et al. 2017).

77           In addition to the influence of plant host identity, environmental factors can also shape the  
78 rhizosphere microbiome. For example, the local environment directly affects rhizosphere communities by

79 determining the available source pool of microorganisms, since soil microbial communities are structured  
80 by both spatial and environmental gradients (Fierer and Jackson 2006; Xue et al. 2018; Rath et al. 2019).  
81 Local environmental conditions can also indirectly influence rhizosphere community composition by  
82 affecting plant and microbial physiology (Aira et al. 2010). For example, many environmental factors can  
83 influence root exudate composition, such as nutrient availability (Zhang et al. 1991; Carvalhais et al.  
84 2011), pathogenesis (Gu et al. 2016), drought (Gargallo-Garriga et al. 2018), and flooding (Henry et al.  
85 2007), thereby influencing rhizosphere composition. As a result, environmental conditions can outweigh  
86 the effects of plant host identity (i.e. differences among plant species or genotypes) in structuring  
87 rhizosphere communities (Marschner et al. 2004; Peiffer et al. 2013). While considerable recent  
88 microbiome research has been focused on economically important crops, less is known about the  
89 interplay between plant host and the local environment for wild plants, which experience relatively higher  
90 variability in their local environments than plants grown in managed systems.

91 In this study, we used a field reciprocal transplant experiment to better understand the  
92 contributions of both the environment and host plant identity to rhizosphere microbiome composition. We  
93 used two locally adapted ecotypes (coastal versus inland) of the yellow monkeyflower, *Mimulus guttatus*  
94 (syn. *Erythranthe guttata* (Fisch. ex DC.) G.L. Nesom), a model species for ecological and evolutionary  
95 genomics (Twyford et al. 2015; Wu et al. 2008). Coastal and inland ecotypes are highly locally adapted to  
96 their respective habitats (Hall et al. 2010; Lowry et al. 2008; Lowry and Willis 2010; Hall and Willis  
97 2006). Inland habitats of *M. guttatus* experience a hot summer drought, for which these populations have  
98 evolved an early flowering, annual life-history strategy to escape from the long period of low soil water  
99 availability (Lowry et al. 2008; Hall and Willis 2006). In contrast, coastal habitats typically are much  
100 cooler as a result of proximity to the Pacific Ocean, which drives the production of summer sea fog.  
101 However, coastal populations of *M. guttatus* contend with pervasive oceanic salt spray, for which they are  
102 locally adapted (Lowry et al. 2008, 2009). Here, we planted coastal and inland ecotypes of *M. guttatus* in  
103 both coastal and inland sites and investigated rhizosphere and bulk soil microbial community composition  
104 after three months of growth.

105

## 106 **Materials and Methods**

### 107 *Experimental Design*

108 To establish the relative role of environment (coastal versus inland site) and ecotype (coastal  
109 perennial versus inland annual) on the *M. guttatus* microbial rhizosphere community, we leveraged a  
110 reciprocal transplant experiment conducted in Sonoma County, CA, USA in the spring of 2017 (Popovic  
111 and Lowry 2019). Briefly, accessions from two coastal perennial populations (SWB-11, 39.0359 N, -  
112 123.6905 W; MRR-13, 38.4564 N, -123.1409 W) and two inland annual populations (LMC-24, 38.8640  
113 N, -123.0840 W; OCC-31, 38.4095 N, -122.9355 W) were used for the experiment. Source populations  
114 for the SWB and LMC seeds are in Mendocino County, CA, and have been used in many recent studies  
115 of genetics and local adaptation in this system (Lowry et al. 2008, 2009). The MRR and OCC source  
116 populations are located in Sonoma County, CA (Popovic and Lowry 2019). All accessions were grown  
117 for at least one generation in the Michigan State University greenhouses to control for maternal effects.

118 Seeds were planted on wet Sunshine Soil Mix #1 (SunGro Horticulture, Agawam, MA) on  
119 February 1, 2017 in two 54.28 x 27.94 cm potting trays per genotype. Seeds were then stratified at 4°C  
120 for 10-17 days (10 days for coastal accessions, 17 days for inland accessions), and subsequently  
121 germinated at University of California, Berkeley's Oxford Track greenhouse facilities under 16 hours of  
122 light. Different lengths of stratification were used for the two ecotypes because the inland ecotype  
123 germinates earlier and grows faster than the coastal genotype early in development. This allowed  
124 seedlings to be transplanted to the field later at the same developmental stage. On February 28th, all  
125 seedlings were moved to the greenhouse at the Bodega Marine Reserve ([bml.ucdavis.edu/bmr/](http://bml.ucdavis.edu/bmr/)) in Bodega  
126 Bay, CA.

127 We transplanted seedlings at the four-leaf stage into the coastal site on March 8th and into the  
128 inland site on March 9th. The coastal site was located at the Bodega Marine Reserve, Bodega Bay, CA, in  
129 a perennial seep at the south end of Horseshoe Cove (38.315716 N, -123.068625 W; ~60 m from the  
130 ocean). The inland site was planted in a seasonal grassland seep at the Pepperwood Preserve in Santa

131 Rosa, CA (38.575545 N, -122.700851 W; 39.84 km from the ocean). Native populations of *M. guttatus*  
132 are located in both seeps. Prior to planting, three 1 x 1 m plots were cleared of native vegetation at each  
133 site. Each plot included a total of 100 plants ( $N=25$  of each genotype), which were all equally spaced  
134 from one another throughout the plot ( $N=100$  per plot, 300 per site, 600 total). Plants were then grown for  
135 three months until being harvested for rhizosphere community analyses.

136

### 137 *Sample collection and processing*

138 On June 13<sup>th</sup>-15<sup>th</sup>, five replicate *M. guttatus* rhizosphere soils were collected from each genotype  
139 at each field environment from plants that were spatially distributed across all three plots. Rhizosphere  
140 soil was isolated by uprooting the plant with a trowel, discarding excess soils from around the roots, and  
141 shaking what soil remained attached to the root into a sterile Whirl-Pak bag. Rhizosphere soils were  
142 homogenized with an ethanol-sterilized metal spatula, aliquoted into cryovials, flash frozen in liquid  
143 nitrogen, and stored on ice. Above- and belowground tissue for each plant was stored in a paper bag and  
144 transported at ambient temperature to the lab at Michigan State University, washed with distilled water,  
145 and dried for 1 week at 60°C before measuring dry biomass. In addition, bulk soil cores (10 cm x 2 cm)  
146 were collected randomly across the three plots at each site, sieved, and homogenized in a sterile Whirl-  
147 Pak bag and stored on ice. Bulk soil samples were subsequently analyzed for phosphorus, potassium,  
148 calcium, magnesium, copper, percent organic matter, sodium, nitrate, ammonium, percent nitrogen, and  
149 sulfur at the Michigan State University Soil and Plant Nutrient Laboratory following their standard  
150 protocols (<http://www.spnl.msu.edu/>). Gravimetric soil water content was determined from the loss of  
151 mass in soils dried for one week at 60°C. We assessed significant differences in soil chemistry with t-tests  
152 in R 3.5.0 (R Core Team 2018). The homogeneity of variance assumption was assessed using both  
153 Bartlett's and Levene's tests (Levene 1960; Snedecor and Cochran 1989) in the 'car' package (Fox and  
154 Weisberg 2011) of R, and the Welch's t-test was used when the homogeneity of variance assumption was  
155 not met.

156

157 *DNA Extraction and Sequencing*

158 DNA was extracted from the five replicate rhizosphere soil samples of each *M. guttatus* genotype  
159 from each environment (n=40 samples; five replicates of each of four genotypes at each of two sites), as  
160 well as from ten bulk soil samples (five replicates from each of two sites). We used the MoBio PowerSoil  
161 Total DNA Isolation Kit (Carlsbad, CA, USA) following the manufacturer's instructions. Extracted DNA  
162 was quantified fluorometrically with the Qubit (ThermoFisher, Waltham, MA, USA). DNA from each  
163 sample was diluted to < 10 ng  $\mu\text{l}^{-1}$  for paired-end amplicon sequencing using the dual-indexed primer pair  
164 515F/806R (Kozich et al. 2013). Samples were prepared for sequencing by the Michigan State University  
165 Genomics Core (East Lansing, MI, USA) including PCR amplification and library preparation using the  
166 Illumina TruSeq Nano DNA Library Preparation Kit. Paired-end, 250bp reads were generated on an  
167 Illumina MiSeq and the Genomics Core provided standard Illumina quality control and sample  
168 demultiplexing.

169

170 *Sequence processing*

171 The rhizosphere and bulk soil sequencing datasets were analyzed together. Paired-end reads were  
172 merged using USEARCH v10.0.240 (Edgar 2010) and primer-binding regions removed using cutadapt  
173 v1.18 (Martin 2011), then reads were quality-filtered, dereplicated, and clustered into zero-radius OTUs  
174 using the USEARCH v9.2.64/v10.0.240 and UNOISE pipeline (Edgar 2016). Taxonomy annotations  
175 were assigned in Qiime v1.9.0 (Caporaso et al. 2010) using UCLUST (Edgar 2010) against the SILVA  
176 rRNA database v123 (Quast et al. 2013) and were added to the .biom file using the biom-format package  
177 (McDonald et al. 2012). Sequences that were unassigned at the phylum level, along with those matching  
178 chloroplasts or mitochondria, were excluded from analyses. Representative sequences were aligned using  
179 MUSCLE 3.8.1 (Edgar 2004) and FastTree v2.1.10 (Price et al. 2009, 2010) was used to build a  
180 phylogenetic tree. Samples were rarefied to the minimum number of sequences observed per sample  
181 (22,354) for all subsequent analyses. We calculated species richness, Shannon diversity, and phylogenetic

182 diversity in QIIME, as well as beta diversity using weighted UniFrac distance (Lozupone and Knight  
183 2005) for Principal Coordinates Analysis (PCoA).

184 Statistical analyses were performed in R 3.5.0 (R Core Team 2018). We assessed the effects of  
185 abiotic (phosphorus, potassium, calcium, magnesium, copper, percent organic matter, sodium, nitrate,  
186 ammonium, percent nitrogen, and sulfur) parameters on microbial community composition by fitting  
187 variables to weighted UniFrac distance with the R package *vegan* v2.5-2 (Oksanen et al. 2018). We  
188 included parameters that had significant explanatory value ( $p < 0.1$ ) for PCoA axis 1 or 2. Differences in  
189 community composition across categorical groups (rhizosphere versus bulk soil, inland versus coastal  
190 sites, inland versus coastal ecotypes at each site, etc.) were calculated with PERMANOVA (Anderson  
191 2001). We also tested for differences in group dispersions with PERMDISP (Anderson 2006). For alpha  
192 diversity metrics (species richness, phylogenetic diversity, and Shannon diversity), we tested for  
193 differences between ecotypes at each site, and between each ecotype and bulk soil at each site, using t-  
194 tests. Next, we selected the twenty most abundant taxa at the class level and tested for differences in  
195 abundance of these taxa using t-tests with an FDR-adjusted p-value for multiple comparisons. Within  
196 each site, we compared inland versus coastal ecotypes, as well as each ecotype versus bulk soil. We also  
197 compared genotypes within ecotypes at each site.

198 Given that the coastal and inland ecotypes differed in community composition only at the inland  
199 site, we further explored the inland site alone to better understand the factors distinguishing the  
200 microbiomes of the two ecotypes. First, we conducted an indicator species analysis, which aims to  
201 determine which taxa are characteristic of a given treatment group, taking into account the abundances of  
202 a given taxon for each treatment group (specificity), as well as the proportion of samples in each  
203 treatment group in which that taxon occurs (fidelity) (De Cáceres and Legendre 2009; De Cáceres et al.  
204 2010). We used the *multipatt* function (De Cáceres et al. 2010) in the R package *indicspecies* (De Cáceres  
205 and Legendre 2009). Next, we tested for ecotype differences in relative abundance of individual OTUs  
206 using t-tests with FDR-adjusted p-values for multiple comparisons. Finally, we generated Venn diagrams  
207 using the R packages *gplots* (Warnes et al. 2019) and *VennDiagram* (Chen 2018) to assess differences in



208 the presence/absence of individual taxa between the two ecotypes. Data were visualized using a  
209 combination of the R packages ggplot2 v2.2.1 (Wickham 2009), reshape2 v.1.4.3 (Wickham 2007), and  
210 cowplot v0.9.2 (Wilke 2017). Package plyr v.1.8.4 (Wickham 2011) was used for data summaries.

#### 211 *Data availability and computing workflows*

212 Raw reads were submitted to the NCBI Sequence Read Archive under accession numbers  
213 PRJNA451377 (rhizosphere samples) and PRJNA526056 (bulk soil samples). All plant and  
214 environmental data, as well as computational workflows and custom scripts, are available on GitHub  
215 ([https://github.com/ShadeLab/PAPER\\_MimulusRecipTransplant\\_Submitted](https://github.com/ShadeLab/PAPER_MimulusRecipTransplant_Submitted)).

216

## 217 **Results**

### 218 *Soil characteristics and plant performance differ across sites*

219 The coastal and inland sites had very different soil properties (Table 1). Nearly all measured  
220 abiotic parameters significantly differed between the coastal and inland sites, with the exception of pH,  
221 ammonium, nitrate, and percent nitrogen. Plants also performed differently in the coastal and inland sites.  
222 Plants grown in the coastal site tended to be larger in both shoot and root mass than those grown in the  
223 inland site (Figure S1), although this was only significant for genotype MRR (coastal ecotype).

### 224 *Site and ecotype influence microbial community composition*

225 A principal coordinates analysis based on weighted UniFrac distances found that two axes  
226 captured nearly 60% of the variation in the amplicon sequencing dataset (45.8% variation explained for  
227 PC1 and 13.9% for PC2) (Figure 1). Numerous abiotic parameters had significantly explanatory value for  
228 PCoA axis 1, which largely distinguished the coastal and the inland sites. Coastal site samples were  
229 associated with greater moisture content, sodium, phosphorus, and sulfur, while inland site samples were  
230 associated with greater potassium, calcium, magnesium, and copper (Figure 1).

231 PERMANOVA revealed significant clustering of microbial communities by sample type  
232 (rhizosphere versus bulk soil;  $F=8.011$ ,  $P=0.001$ ) and site (coastal versus inland;  $F=43.227$ ,  $P=0.001$ ), as  
233 well as their interaction ( $F=4.307$ ,  $P=0.006$ ). We therefore investigated further by dividing the dataset by

234 site and found that rhizosphere and bulk soils significantly differed in community composition at both the  
235 coastal and the inland sites ( $F=8.2951$ ,  $P=0.001$ ; and  $F=4.918$ ,  $P=0.005$ , respectively), and differed in  
236 variability by PERMDISP at the coastal site ( $F=10.73$ ,  $P=0.002$ ). We next subdivided the rhizosphere  
237 samples by ecotype. We found that site influenced community composition for both the coastal  
238 ( $F=28.828$ ,  $P=0.001$ ) and inland ecotypes ( $F=16.319$ ,  $P=0.001$ ). In addition, the coastal ecotype differed  
239 in variability between the two sites ( $F=7.3244$ ,  $P=0.013$ ). Next, we found that inland ecotype  
240 rhizospheres differed from bulk soil in community composition at both the coastal and inland sites  
241 ( $F=6.2055$ ,  $P=0.001$ ; and  $F=5.2513$ ,  $P=0.007$ , respectively), and differed in variability at the coastal site  
242 ( $F=13.198$ ,  $P=0.004$ ). Similarly, coastal ecotype rhizospheres differed from bulk soil at both the coastal  
243 and inland sites ( $F=10.474$ ,  $P=0.001$ ; and  $F=3.8461$ ,  $P=0.004$ , respectively). We also tested for  
244 differences between ecotypes at each site and found that inland and coastal ecotypes differed in  
245 community composition at the inland site ( $F=3.279$ ,  $P=0.006$ ), but not at the coastal site ( $F=1.6859$ ,  
246  $P=0.095$ ). Finally, we tested for differences between genotypes (within each ecotype at each site), and  
247 found that genotypes did not differ in any instance (all  $P>0.1$ ).

#### 248 *Ecotypes differ in rhizosphere communities at inland site*

249 Across environments and ecotypes, we detected 14,869 OTUs spanning a breadth of phylogenetic  
250 diversity. Overall, alpha diversity metrics did not differ between either ecotype and bulk soil at either site  
251 (Figure 2). However, the inland ecotype exhibited greater species richness ( $t=-3.2507$ ,  $P=0.006$ ),  
252 phylogenetic diversity ( $t=-3.2446$ ,  $P=0.004$ ), and Shannon diversity ( $t=-2.9905$ ,  $P=0.012$ ) than the coastal  
253 ecotype at the inland site (Figure 2).

254 Each ecotype exhibited some of the same compositional shifts in microbial communities (relative  
255 to bulk soil) in both sites. At both the coastal and inland sites, the inland ecotype exhibited lower relative  
256 abundance of Acidobacteria, Gemmatimonadetes, Nitrospira, and higher relative abundance of  
257 Planctomycetacia, compared to bulk soils (Figure 3). Similarly, at both sites, the coastal ecotype exhibited  
258 lower relative abundance of Nitrospira, and higher relative abundance of Planctomycetacia, compared to  
259 bulk soils. Within each site, both ecotypes influenced the relative abundance of numerous taxa in similar

260 ways. At the coastal site, both ecotypes exhibited lower relative abundance of Acidobacteria,  
261 Anaerolineae, Gemmatimodetes, Nitrospira, Deltaproteobacteria, and OPB35-Soil, and higher relative  
262 abundance of Thermoleophilia, Cytophagia, Sphingobacteria, KD4-96, Planctomycetacia, and Alpha-  
263 proteobacteria, compared to bulk soil (Figure 3). Similarly, at inland site, both ecotypes exhibited lower  
264 relative abundance of Nitrospira and higher relative abundance of Planctomycetacia compared to bulk  
265 soil. There were exceptions to this rule, however. For example, at the inland site, the inland ecotype  
266 exhibited lower relative abundance of Acidobacteria, Gemmatimodetes, Spartobacteria, and higher  
267 relative abundance of Actinobacteria compared to bulk soil, while the coastal ecotype did not (Figure 3).

268 Directly comparing the coastal and inland ecotypes (Figure 4), we found that the two ecotypes  
269 exhibited very similar relative abundances of microbial taxa at the class level. The two ecotypes did differ  
270 in the abundances of several highly abundant taxa, but only at the inland site. At the inland site, the inland  
271 ecotype had higher relative abundance of Cytophagia, Deltaproteobacteria, Gammaproteobacteria, and  
272 Verrucomicrobiae, but lower relative abundance of Acidobacteria, than the coastal ecotype (Figure 4).  
273 Genotypes within each ecotype did not differ in relative abundances of taxa at either the coastal or the  
274 inland site (Figure S2).

#### 275 *Presence/absence of rare taxa differs between coastal and inland ecotypes at the inland site*

276 Given that inland and coastal ecotypes differed in overall community composition (Figure 1),  
277 alpha diversity (Figure 2), and several highly-abundant bacterial classes at the inland site (Figures 3 and  
278 4), but not the coastal site, we further explored the differences between ecotypes at the inland site.  
279 Indicator species analysis revealed that no bacterial species were indicative of inland versus coastal  
280 ecotypes at the inland site (all adjusted  $P > 0.05$ ). In addition, the inland and coastal ecotypes did not differ  
281 in relative abundance of any individual OTUs at the inland site. However, the two ecotypes did differ in  
282 the presence/absence of numerous OTUs at the inland site: 1,157 OTUs were present in the coastal but  
283 not the inland ecotype, while 2,065 OTUs were present in the inland but not the coastal ecotype (Figure  
284 5). These OTUs were in extremely low relative abundance (roughly ten-fold lower mean relative  
285 abundance) compared to the 6,290 OTUs shared by the ecotypes and bulk soil. The OTUs distinguishing

286 the coastal and inland ecotypes also had very low occupancy (i.e. were present in a small proportion of  
287 samples per ecotype). In the coastal ecotype, only 14 of the 1,157 OTUs unique to the coastal ecotype  
288 were present in at least half of the coastal ecotype samples. Similarly, in the inland ecotype, only 99 of the  
289 2,065 OTUs unique to the inland ecotype were present in at least half of the inland ecotype samples.  
290 Interestingly, although the majority of the OTUs observed at the inland site (7,537 out of 11,553) were  
291 found in bulk soil plus one or both ecotypes, a large number of OTUs were found in either the coastal  
292 ecotype (741 OTUs), the inland ecotype (1,234 OTUs), or both (1,484 OTUs), but not the bulk soil. Only  
293 557 of the 11,553 OTUs observed at the inland site were found in bulk soil alone with no observations in  
294 either ecotype (Figure 5).

295

## 296 **Discussion**

297 Interactions between plant roots and soil microorganisms strongly influence plant health and  
298 productivity, yet the relative role of host plant identity versus the local environment in shaping the  
299 rhizosphere microbiome is not well understood. To begin to unravel this we examined the rhizosphere  
300 communities of two ecotypes of *M. guttatus*, which are locally adapted to distinct environments, in a  
301 reciprocal transplant experiment.

302 The local environment (coastal versus inland site) strongly influenced rhizosphere microbial  
303 communities in *M. guttatus*. This effect is due, at least in part, to distinct microbial source pools in the  
304 bulk soil at each site. This finding was not surprising given that abiotic conditions strongly differed  
305 between the two sites and microbial community structure is often influenced by environmental gradients  
306 (Lauber et al. 2009; Fierer et al. 2012; Xue et al. 2018; Sorensen et al. 2019). For example, both salinity  
307 (Rath et al. 2019) and moisture availability (Brockett et al. 2012), two of the major factors distinguishing  
308 the coastal and inland sites, can have substantial effects on microbial community structure. Nevertheless,  
309 despite the drastically different abiotic (soil nutrient availability, salinity, and moisture) and biotic (bulk  
310 soil inoculum) conditions between the two sites, the presence of *M. guttatus* strongly influenced microbial  
311 communities at both coastal and inland sites. This is in agreement with the general observation that plants

312 play a major role in regulating soil microbial community composition and function (reviewed in  
313 (Bulgarelli et al. 2013; Lareen et al. 2016; Coskun et al. 2017)).

314 Host plant identity influenced rhizosphere community composition in *M. guttatus*, but to a  
315 smaller extent than the influence of environment. At each site, the two ecotypes exhibited remarkably  
316 similar composition of microbial communities at the class level. Many of the shared lineages are  
317 commonly associated with rhizospheres, including Actinobacteria, Firmicutes, Alpha- and Beta-  
318 proteobacteria (Philippot et al. 2013), suggesting evolutionarily-conserved mechanisms for recruiting  
319 and/or sustaining these taxa. Indeed, our results indicate that divergent *M. guttatus* ecotypes recruit  
320 phylogenetically similar rhizosphere communities, even in environments to which they are maladapted.  
321 Nevertheless, when planted in a common garden at the inland site, the two ecotypes differed in overall  
322 community composition, with the inland ecotype recruiting a more OTU-rich and phylogenetically-  
323 diverse rhizosphere than the coastal ecotype. This difference in communities between ecotypes at the  
324 inland site is largely due to low abundance (rare) and low occupancy (found in a low proportion of  
325 samples) microbial OTUs found in one ecotype at the exclusion of the other. Although the relative rarity  
326 of these OTUs suggests they may be present in the *M. guttatus* rhizosphere due to stochastic processes  
327 rather than by deterministic recruitment by the plant host, rare microbial taxa have the potential to provide  
328 a reservoir of microbial functions that can support community stability despite environmental fluctuations  
329 (Shade et al. 2014; Shade and Gilbert 2015). The ability of the inland ecotype to harbor greater microbial  
330 diversity, due to rare taxa, could potentially contribute to its higher fitness at the inland site compared to  
331 the coastal ecotype. Nevertheless, the design of the present study does not allow us to determine whether  
332 differing rhizosphere communities at the inland site are a cause or a consequence of the evolutionary  
333 divergence between the ecotypes. Future work should explore the potential role of the rhizosphere  
334 microbiome in local adaptation in this system by examining growth and fitness of the two ecotypes in  
335 sterilized and unsterilized ‘home’ and ‘away’ soil. For this type of experiment, a greater difference in  
336 fitness between the two ecotypes in the unsterilized soil would indicate that soil microbial communities  
337 contribute to local adaptation and ecotypic divergence in *M. guttatus*.

338 Taken together, our results indicate that plant host identity impacts rhizosphere communities, and  
339 the two locally adapted *M. guttatus* ecotypes are genetically diverged in the factors shaping those  
340 communities. Although numerous studies have documented genetic differentiation for rhizosphere  
341 microbiome communities in crops and model species in controlled environments (Costa et al. 2006;  
342 Micallef et al. 2009; Aira et al. 2010; Peiffer et al. 2013; Mahoney et al. 2017), our work is one of only a  
343 few studies reporting genotype-specific effects of wild plants in natural environments (Kuske et al. 2002;  
344 Osanai et al. 2013; Aleklett et al. 2015). We hypothesize that variable root exudate composition and/or  
345 root morphology between *M. guttatus* ecotypes acts to differentially shape rhizosphere community  
346 structure in these ecotypes. Nevertheless, our results show that the effect of host plant identity is  
347 environment-dependent, given that the two ecotypes did not differ in community composition when  
348 planted at the coastal site. This complex interplay between host identity and environment is in agreement  
349 with the contrasting results seen in studies of cultivated crops. For example, some studies report that  
350 differences in rhizosphere community composition across species or genotypes are environment-  
351 dependent (Marschner et al. 2004; Costa et al. 2006; Peiffer et al. 2013), while others find that differences  
352 across species or genotypes are maintained regardless of environment (Mahoney et al. 2017; Marschner et  
353 al. 2001). Previous work in the *M. guttatus* system has found that the coastal ecotype exhibits extremely  
354 low fitness in inland sites due to near-zero survival-to-flowering rates (Lowry et al. 2008; Lowry and  
355 Willis 2010). Although the sample collections made here were completed before the inland site dried out  
356 for the summer, it is possible that the early stages of physiological stress at the inland environment  
357 contributed to the differences in rhizosphere composition between the two ecotypes seen here. In any  
358 case, although the two ecotypes are indeed genetically diverged in factors shaping the rhizosphere  
359 microbiome, environmental factors outweigh genetic factors in shaping the *M. guttatus* microbiome at  
360 least for the field sites examined in our study.

361 It is worth noting that numerous taxa were detected in the *M. guttatus* rhizosphere that were not  
362 detected in bulk soil. One possible cause of this discrepancy is that the ecotypes recruited taxa that were  
363 so rare in the bulk soil that they were below the threshold of detection. Another possibility is that some

364 taxa were carried over from the horticultural soil in which the seedlings were originally germinated before  
365 transplanting to the field. A final possibility is maternal packaging of microbial endophytes in the seed  
366 (Shade et al. 2017; Rezki et al. 2018), which occurs across diverse plant groups (Nelson 2018) and can  
367 influence rhizosphere community composition (Bacilio-Jiménez et al. 2001). More work is needed to  
368 determine the potential contributions of seed packaging versus local recruitment to rhizosphere assembly  
369 in *Mimulus* and its potential relevance for plant productivity and local adaptation.

370 In summary, we found that the local environment (coastal versus inland site) strongly influenced  
371 rhizosphere communities, at least in part due to distinct composition of the microbial source pool at each  
372 site. Although host plant identity also influenced rhizosphere community composition, it was to a much  
373 smaller extent than the influence of the environment. At each site, the two ecotypes exhibited remarkably  
374 similar composition of microbial communities at the class level, indicating that divergent *M. guttatus*  
375 ecotypes recruit phylogenetically similar rhizosphere communities, even in environments to which they  
376 are maladapted. Nevertheless, the two ecotypes did differ in rhizosphere community composition at least  
377 at the inland site primarily, due to rare (low abundance and low occupancy) OTUs. Overall, the  
378 environment-dependence of the differences between ecotypes in rhizosphere communities indicates that  
379 strong environmental gradients can obscure plant genetic factors in regulating the *M. guttatus*  
380 microbiome. Our findings demonstrate that wild plants strongly impact the structure of soil microbial  
381 communities regardless of environment, yet also highlight the context-specific interactions between host  
382 identity and local environment in shaping those communities.

383

#### 384 **Acknowledgments**

385 The authors thank Benjamin Blackman, Erin Patterson, and the University of California Berkeley  
386 greenhouse staff for maintaining our seedlings prior to this experiment and Daniel Jackson for assisting  
387 with the fieldwork. We are grateful to the Pepperwood Preserve and University of California, Davis  
388 Bodega Marine Reserve for permission to conduct our experiments at these locations. We would  
389 especially like to thank Michelle Halbur and Michael Gillogly (Pepperwood) as well as Jacqueline Sones



390 (Bodega) for helping to facilitate our research. The Department of Parks and Recreation of the State of  
391 California provided permission to make seed collections for this experiment. This work was supported in  
392 part by funding from the Michigan State University Plant Resilience Institute to AS and DBL, and  
393 Michigan State University through a startup package to DBL. Computational resources were provided by  
394 the Institute for Cyber-Enabled Research.

395

## 396 **Literature Cited**

397 Aira, M., Gómez-Brandón, M., Lazcano, C., Bååth, E., and Domínguez, J. 2010. Plant genotype strongly  
398 modifies the structure and growth of maize rhizosphere microbial communities. *Soil Biol. Biochem.*  
399 42:2276–2281

400 Aleklett, K., Leff, J. W., Fierer, N., and Hart, M. 2015. Wild plant species growing closely connected in a  
401 subalpine meadow host distinct root-associated bacterial communities. *PeerJ.* 3:e804

402 Anderson, M. J. 2006. Distance-based tests for homogeneity of multivariate dispersions. *Biometrics.*  
403 62:245–253

404 Anderson, M. J. M. J. 2001. A new method for non-parametric multivariate analysis of variance. *Austral*  
405 *Ecol.* 26:32–46

406 Angers, D. A., and Caron, J. 1998. Plant-induced changes in soil structure: processes and feedbacks.  
407 *Biogeochemistry.* 42:55–72

408 Bacilio-Jiménez, M., Aguilar-Flores, S., del Valle, M. V., Pérez, A., Zepeda, A., and Zenteno, E. 2001.  
409 Endophytic bacteria in rice seeds inhibit early colonization of roots by *Azospirillum brasilense*. *Soil*  
410 *Biol. Biochem.* 33:167–172

411 Berendsen, R. L., Pieterse, C. M. J., and Bakker, P. A. H. M. 2012. The rhizosphere microbiome and  
412 plant health. *Trends Plant Sci.* 17:478–486

413 Berg, G., Roskot, N., Steidle, A., Eberl, L., Zock, A., and Smalla, K. 2002. Plant-dependent genotypic  
414 and phenotypic diversity of antagonistic rhizobacteria isolated from different *Verticillium* host  
415 plants. *Appl. Environ. Microbiol.* 68:3328–3338



- 416 Berg, G., and Smalla, K. 2009. Plant species and soil type cooperatively shape the structure and function  
417 of microbial communities in the rhizosphere. *FEMS Microbiol. Ecol.* 68:1–13
- 418 Bever, J. D., Platt, T. G., and Morton, E. R. 2012. Microbial population and community dynamics on  
419 plant roots and their feedbacks on plant communities. *Annu. Rev. Microbiol.* 66:265–283
- 420 Bouffaud, M. L., Kyselková, M., Gouesnard, B., Grundmann, G., Muller, D., and Moëgne-Loccoz, Y.  
421 2012. Is diversification history of maize influencing selection of soil bacteria by roots? *Mol. Ecol.*  
422 21:195–206
- 423 Bowen, J. L., Kearns, P. J., Byrnes, J. E. K., Wigginton, S., Allen, W. J., Greenwood, M., Tran, K., Yu,  
424 J., Cronin, J. T., and Meyerson, L. A. 2017. Lineage overwhelms environmental conditions in  
425 determining rhizosphere bacterial community structure in a cosmopolitan invasive plant. *Nat.*  
426 *Commun.* 8:433
- 427 Bressan, M., Roncato, M.-A., Bellvert, F., Comte, G., Haichar, F. el Z., Achouak, W., and Berge, O.  
428 2009. Exogenous glucosinolate produced by *Arabidopsis thaliana* has an impact on microbes in the  
429 rhizosphere and plant roots. *ISME J.* 3:1243–1257
- 430 Brockett, B. F. T., Prescott, C. E., and Grayston, S. J. 2012. Soil moisture is the major factor influencing  
431 microbial community structure and enzyme activities across seven biogeoclimatic zones in western  
432 Canada. *Soil Biol. Biochem.* 44:9–20
- 433 Broeckling, C. D., Broz, A. K., Bergelson, J., Manter, D. K., and Vivanco, J. M. 2008. Root exudates  
434 regulate soil fungal community composition and diversity. *Appl. Environ. Microbiol.* 74:738–744
- 435 Bulgarelli, D., Rott, M., Schlaeppi, K., Ver Loren van Themaat, E., Ahmadinejad, N., Assenza, F., Rauf,  
436 P., Huettel, B., Reinhardt, R., Schmelzer, E., Peplies, J., Gloeckner, F. O., Amann, R., Eickhorst, T.,  
437 and Schulze-Lefert, P. 2012. Revealing structure and assembly cues for *Arabidopsis* root-inhabiting  
438 bacterial microbiota. *Nature.* 488:91–95
- 439 Bulgarelli, D., Schlaeppi, K., Spaepen, S., Ver Loren van Themaat, E., and Schulze-Lefert, P. 2013.  
440 Structure and functions of the bacterial microbiota of plants. *Annu. Rev. Plant Biol.* 64:807–838
- 441 Busby, P. E., Peay, K. G., and Newcombe, G. 2016. Common foliar fungi of *Populus trichocarpa* modify

- 442 Melampsora rust disease severity. *New Phytol.* 209:1681–1692
- 443 De Cáceres, M., and Legendre, P. 2009. Associations between species and groups of sites : indices and  
444 statistical inference. *Ecology.* 90:3566–3574
- 445 De Cáceres, M., Legendre, P., and Moretti, M. 2010. Improving indicator species analysis by combining  
446 groups of sites. *Oikos* 119:1674–1684
- 447 Caporaso, J. G., Kuczynski, J., Stombaugh, J., Bittinger, K., Bushman, F. D., Costello, E. K., Fierer, N.,  
448 Peña, A. G., Goodrich, J. K., Gordon, J. I., Huttley, G. A., Kelley, S. T., Knights, D., Koenig, J. E.,  
449 Ley, R. E., Lozupone, C. A., McDonald, D., Muegge, B. D., Pirrung, M., Reeder, J., Sevinsky, J. R.,  
450 Turnbaugh, P. J., Walters, W. A., Widmann, J., Yatsunenko, T., Zaneveld, J., and Knight, R. 2010.  
451 QIIME allows analysis of highthroughput community sequencing data. *Nat. Methods.* 7:335–336
- 452 Carvalhais, L. C., Dennis, P. G., Badri, D. V., Kidd, B. N., Vivanco, J. M., and Schenk, P. M. 2015.  
453 Linking jasmonic acid signaling, root exudates, and rhizosphere microbiomes. *Mol. Plant-Microbe*  
454 *Interact.* 28:1049–58
- 455 Carvalhais, L. C., Dennis, P. G., Fedoseyenko, D., Hajirezaei, M.-R., Borriss, R., and Von Wirén, N.  
456 2011. Root exudation of sugars, amino acids, and organic acids by maize as affected by nitrogen,  
457 phosphorus, potassium, and iron deficiency. *J. Plant Nutr. Soil Sci.* 174:3–11
- 458 Chaparro, J. M., Badri, D. V., and Vivanco, J. M. 2014. Rhizosphere microbiome assemblage is affected  
459 by plant development. *ISME J.* 8:790–803
- 460 Chen, H. 2018. VennDiagram: generate high-resolution Venn and Euler plots. R package version 1.6.20.
- 461 Coskun, D., Britto, D. T., Shi, W., and Kronzucker, H. J. 2017. How plant root exudates shape the  
462 nitrogen cycle. *Trends Plant Sci.* 22:661–673
- 463 Costa, R., Götz, M., Mrotzek, N., Lottmann, J., Berg, G., and Smalla, K. 2006. Effects of site and plant  
464 species on rhizosphere community structure as revealed by molecular analysis of microbial guilds.  
465 *FEMS Microbiol. Ecol.* 56:236–249
- 466 Edgar, R. C. 2004. MUSCLE: multiple sequence alignment with high accuracy and high throughput.  
467 *Nucleic Acids Res.* 32:1792–1797

- 468 Edgar, R. C. 2010. Search and clustering orders of magnitude faster than BLAST. *Bioinformatics*.  
469 26:2460–2461
- 470 Edgar, R. C. 2016. UNOISE2: improved error-correction for Illumina 16S and ITS amplicon sequencing.  
471 bioRxiv.
- 472 Edwards, J., Johnson, C., Santos-Medellín, C., Lurie, E., Podishetty, N. K., Bhatnagar, S., Eisen, J. A.,  
473 and Sundaresan, V. 2015. Structure, variation, and assembly of the root-associated microbiomes of  
474 rice. *Proc. Natl. Acad. Sci.* 112:E911-20
- 475 Fierer, N., and Jackson, R. B. 2006. The diversity and biogeography of soil bacterial communities. *Proc.*  
476 *Natl. Acad. Sci. U. S. A.* 103:626–631
- 477 Fierer, N., Lauber, C. L., Ramirez, K. S., Zaneveld, J., Bradford, M. A., and Knight, R. 2012.  
478 Comparative metagenomic, phylogenetic and physiological analyses of soil microbial communities  
479 across nitrogen gradients. *ISME J.* 6:1007–1017
- 480 Fierer, N., Schimel, J. P., and Holden, P. A. 2003. Variations in microbial community composition  
481 through two soil depth profiles. *Soil Biol. Biochem.* 35:167–176
- 482 Fitzpatrick, C. R., Copeland, J., Wang, P. W., Guttman, D. S., Kotanen, P. M., and Johnson, M. T. J.  
483 2018. Assembly and ecological function of the root microbiome across angiosperm plant species.  
484 *Proc. Natl. Acad. Sci.* 115:E1157–E1165
- 485 Fox, J., and Weisberg, S. 2011. *An R Companion to Applied Regression*. 2nd ed. Sage, Thousand Oaks,  
486 CA, USA.
- 487 Friesen, M. L., Porter, S. S., Stark, S. C., von Wettberg, E. J., Sachs, J. L., and Martinez-Romero, E.  
488 2011. Microbially mediated plant functional traits. *Annu. Rev. Ecol. Evol. Syst.* 42:23–46
- 489 Gargallo-Garriga, A., Preece, C., Sardans, J., Oravec, M., Urban, O., and Peñuelas, J. 2018. Root exudate  
490 metabolomes change under drought and show limited capacity for recovery. *Nat. Sci. Reports.* 8:1–  
491 15
- 492 Gu, Y., Wei, Z., Wang, X., Friman, V. P., Huang, J., Wang, X., Mei, X., Xu, Y., Shen, Q., and Jousset, A.  
493 2016. Pathogen invasion indirectly changes the composition of soil microbiome via shifts in root

- 494 exudation profile. *Biol. Fertil. Soils*. 52:997–1005
- 495 Haichar, F. el Z., Marol, C., Berge, O., Rangel-Castro, J. I., Prosser, J. I., Balesdent, J., Heulin, T., and  
496 Achouak, W. 2008. Plant host habitat and root exudates shape soil bacterial community structure.  
497 *ISME J.* 2:1221–1230
- 498 Hall, M. C., Lowry, D. B., and Willis, J. H. 2010. Is local adaptation in *Mimulus guttatus* caused by trade-  
499 offs at individual loci? *Mol. Ecol.* 19:2739–2753
- 500 Hall, M. C., and Willis, J. H. 2006. Divergent selection on flowering time contributes to local adaptation  
501 in *Mimulus guttatus* populations. *Evolution (N. Y.)*. 60:2466–2477
- 502 Henry, A., Doucette, W., Norton, J., and Bugbee, B. 2007. Changes in crested wheatgrass root exudation  
503 caused by flood, drought, and nutrient stress. *J. Environ. Qual.* 36:904–912
- 504 Hu, L., Robert, C. A. M., Cadot, S., Zhang, X., Ye, M., Li, B., Manzo, D., Chervet, N., Steinger, T., Van  
505 Der Heijden, M. G. A., Schlaeppli, K., and Erb, M. 2018. Root exudate metabolites drive plant-soil  
506 feedbacks on growth and defense by shaping the rhizosphere microbiota. *Nat. Commun.* 9:1–13
- 507 Ko, D., Yoo, G., Yun, S.-T., Jun, S.-C., and Chung, H. 2017. Bacterial and fungal community  
508 composition across the soil depth profiles in a fallow field. *J. Ecol. Environ.* 41:1–10
- 509 Kozich, J. J., Westcott, S. L., Baxter, N. T., Highlander, S. K., and Schloss, P. D. 2013. Development of a  
510 dual-index sequencing strategy and curation pipeline for analyzing amplicon sequence data on the  
511 MiSeq Illumina sequencing platform. *Appl. Environ. Microbiol.* 79:5112–5120
- 512 Kuske, C. R., Ticknor, L. O., Miller, M. E., Dunbar, J. M., Davis, J. A., Barns, S. M., and Belnap, J.  
513 2002. Comparison of soil bacterial communities in rhizospheres of three plant species and the  
514 interspaces in an arid grassland. *Appl. Environ. Microbiol.* 68:1854–1863
- 515 Lareen, A., Burton, F., and Schäfer, P. 2016. Plant root-microbe communication in shaping root  
516 microbiomes. *Plant Mol. Biol.* 90:575–587
- 517 Lau, J. A., and Lennon, J. T. 2011. Evolutionary ecology of plant-microbe interactions: soil microbial  
518 structure alters selection on plant traits. *New Phytol.* 192:215–224
- 519 Lau, J. A., and Lennon, J. T. 2012. Rapid responses of soil microorganisms improve plant fitness in novel

- 520 environments. Proc. Natl. Acad. Sci. U. S. A. 109:14058–63
- 521 Lauber, C. L., Hamady, M., Knight, R., and Fierer, N. 2009. Pyrosequencing-based assessment of soil pH  
522 as a predictor of soil bacterial community structure at the continental scale. Appl. Environ.  
523 Microbiol. 75:5111–5120
- 524 Levene, H. 1960. Robust tests for equality of variances. Pages 278–292 in: Contributions to Probability  
525 and Statistics: Essays in Honor of Harold Hotelling, I. Olkin, S.G. Ghurye, W. Hoeffding, W.G.  
526 Madow, and H.B. Mann, eds. Stanford University Press, Palo Alto, CA, USA.
- 527 Lowry, D. B., Hall, M. C., Salt, D. E., and Willis, J. H. 2009. Genetic and physiological basis of adaptive  
528 salt tolerance divergence between coastal and inland *Mimulus guttatus*. New Phytol. 183:776–788
- 529 Lowry, D. B., Rockwood, R. C., and Willis, J. H. 2008. Ecological reproductive isolation of coast and  
530 inland races of *Mimulus guttatus*. Evolution (N. Y). 62:2196–2214
- 531 Lowry, D. B., and Willis, J. H. 2010. A widespread chromosomal inversion polymorphism contributes to  
532 a major life-history transition, local adaptation, and reproductive isolation. PLoS Biol. 8:e1000500
- 533 Lozupone, C., and Knight, R. 2005. UniFrac: a new phylogenetic method for comparing microbial  
534 communities. Appl. Environ. Microbiol. 71:8228–8235
- 535 Mahoney, A. K., Yin, C., and Hulbert, S. H. 2017. Community structure, species variation, and potential  
536 functions of rhizosphere-associated bacteria of different winter wheat (*Triticum aestivum*) cultivars.  
537 Front. Plant Sci. 8:1–14
- 538 Marschner, H., Romheld, V., and Cakmak, I. 1987. Root-induced changes of nutrient availability in the  
539 rhizosphere. J. Plant Nutr. 10:1175–1184
- 540 Marschner, P., Crowley, D., and Yang, C. H. 2004. Development of specific rhizosphere bacterial  
541 communities in relation to plant species, nutrition and soil type. Plant Soil. 261:199–208
- 542 Marschner, P., Yang, C.-H., Lieberei, R., and Crowley, D. E. 2001. Soil and plant specific effects on  
543 bacterial community composition in the rhizosphere. Soil Biol. Biochem. 33:1437–1445
- 544 Martin, M. 2011. Cutadapt removes adapter sequences from high-throughput sequencing reads.  
545 EMBnet.journal. 17:10–12

- 546 McDonald, D., Clemente, J. C., Kuczynski, J., Rideout, J. R., Stombaugh, J., Wendel, D., Wilke, A.,  
547 Huse, S., Hufnagle, J., Meyer, F., Knight, R., and Caporaso, J. G. 2012. The Biological Observation  
548 Matrix (BIOM) format or: how I learned to stop worrying and love the ome-ome. *Gigascience*. 1:7
- 549 McKinney, J., and Cleland, E. E. 2014. Root inputs influence soil water holding capacity and  
550 differentially influence the growth of native versus exotic annual species in an arid ecosystem.  
551 *Restor. Ecol.* 22:766–773
- 552 Micallef, S. A., Shiaris, M. P., and Colón-Carmona, A. 2009. Influence of *Arabidopsis thaliana*  
553 accessions on rhizobacterial communities and natural variation in root exudates. *J. Exp. Bot.*  
554 60:1729–1742
- 555 Nelson, E. B. 2018. The seed microbiome: origins, interactions, and impacts. *Plant Soil*. 422:7–34
- 556 Oksanen, J., Blanchet, F. G., Friendly, M., Kindt, R., Legendre, P., McGlinn, D., Minchin, P. R., O’Hara,  
557 R. B., Simpson, G. L., Solymos, P., Stevens, M. H. H., Szoecs, E., and Wagner, H. 2018. vegan:  
558 Community ecology package. R package version 2.5-2.
- 559 Osanai, Y., Bougoure, D. S., Hayden, H. L., and Hovenden, M. J. 2013. Co-occurring grass species differ  
560 in their associated microbial community composition in a temperate native grassland. *Plant Soil*.  
561 368:419–431
- 562 Peiffer, J. A., Spor, A., Koren, O., Jin, Z., Tringe, S. G., Dangl, J. L., Buckler, E. S., and Ley, R. E. 2013.  
563 Diversity and heritability of the maize rhizosphere microbiome under field conditions. *Proc. Natl.*  
564 *Acad. Sci. U. S. A.* 110:6548–6553
- 565 Pérez-Jaramillo, J. E., Carrión, V. J., Bosse, M., Ferrão, L. F. V., De Hollander, M., Garcia, A. A. F.,  
566 Ramírez, C. A., Mendes, R., and Raaijmakers, J. M. 2017. Linking rhizosphere microbiome  
567 composition of wild and domesticated *Phaseolus vulgaris* to genotypic and root phenotypic traits.  
568 *ISME J.* 11:2244–2257
- 569 Philippot, L., Raaijmakers, J. M., Lemanceau, P., and van der Putten, W. H. 2013. Going back to the  
570 roots: the microbial ecology of the rhizosphere. *Nat. Rev. Microbiol.* 11:789–799
- 571 Popovic, D., and Lowry, D. 2019. Oceanic salt spray and herbivore pressure contribute to local adaptation

572 of coastal perennial and inland annual ecotypes of the Seep Monkeyflower (*Mimulus guttatus*).  
573 bioRxiv.

574 Price, M. N., Dehal, P. S., and Arkin, A. P. 2009. FastTree: computing large minimum evolution trees  
575 with profiles instead of a distance matrix. *Mol. Biol. Evol.* 26:1641–1650

576 Price, M. N., Dehal, P. S., and Arkin, A. P. 2010. FastTree 2 – Approximately maximum-likelihood trees  
577 for large alignments. *PLoS One.* 5

578 Quast, C., Pruesse, E., Yilmaz, P., Gerken, J., Schweer, T., Yarza, P., Peplies, J. J., Glockner, F. O., and  
579 Glöckner, F. O. 2013. The SILVA ribosomal RNA gene database project: improved data processing  
580 and web-based tools. *Nucleic Acids Res.* 41:590–596

581 R Core Team 2018. R: a language and environment for statistical computing. R Foundation for Statistical  
582 Computing, Vienna, Austria. URL <http://www.R-project.org/>.

583 Rath, K. M., Fierer, N., Murphy, D. V., and Rousk, J. 2019. Linking bacterial community composition to  
584 soil salinity along environmental gradients. *ISME J.* 13:836–846

585 Rezki, S., Champion, C., Simoneau, P., Jacques, M.-A., Shade, A., and Barret, M. 2018. Assembly of seed-  
586 associated microbial communities within and across successive plant generations. *Plant Soil.*  
587 422:67–79

588 Ritpitakphong, U., Falquet, L., Vimoltust, A., Berger, A., Métraux, J. P., and L’Haridon, F. 2016. The  
589 microbiome of the leaf surface of *Arabidopsis* protects against a fungal pathogen. *New Phytol.*  
590 210:1033–1043

591 Santhanam, R., Luu, V. T., Weinhold, A., Goldberg, J., Oh, Y., and Baldwin, I. T. 2015. Native root-  
592 associated bacteria rescue a plant from a sudden-wilt disease that emerged during continuous  
593 cropping. *Proc. Natl. Acad. Sci.* 112:E5013–E5020

594 Sasse, J., Martinoia, E., and Northen, T. 2018. Feed your friends: do plant exudates shape the root  
595 microbiome? *Trends Plant Sci.* 23:25–41

596 Shade, A., and Gilbert, J. A. 2015. Temporal patterns of rarity provide a more complete view of microbial  
597 diversity. *Trends Microbiol.* 23:335–340



- 598 Shade, A., Gilbert, J. A., Knight, R., Fierer, N., Caporaso, J. G., Handelsman, J., and Jones, S. E. 2014.  
599 Conditionally rare taxa disproportionately contribute to temporal changes in microbial diversity.  
600 MBio. 5:e01371-14
- 601 Shade, A., Jacques, M.-A., and Barret, M. 2017. Ecological patterns of seed microbiome diversity,  
602 transmission, and assembly. *Curr. Opin. Microbiol.* 37:15-22.
- 603 Snedecor, G., and Cochran, W. 1989. *Statistical methods*. 8th ed. Iowa State University Press, Ames, IA,  
604 USA.
- 605 Sorensen, J. W., Dunivin, T. K., Tobin, T. C., and Shade, A. 2019. Ecological selection for small  
606 microbial genomes along a temperate-to-thermal soil gradient. *Nat. Microbiol.* 4:55–61
- 607 Twyford, A. D., Streisfeld, M. A., Lowry, D. B., and Friedman, J. 2015. Genomic studies on the nature of  
608 species: adaptation and speciation in *Mimulus*. *Mol. Ecol.* 24:2601–2609
- 609 Wagner, M. R., Lundberg, D. S., Coleman-Derr, D., Tringe, S. G., Dangl, J. L., and Mitchell-Olds, T.  
610 2014. Natural soil microbes alter flowering phenology and the intensity of selection on flowering  
611 time in a wild *Arabidopsis* relative. *Ecol. Lett.* 17:651–769
- 612 Warnes, G. R., Bolker, B., Bonebakker, L., Gentleman, R., Huber, W., Liaw, A., Lumley, T., Maechler,  
613 M., Magnusson, A., Moeller, S., Schwartz, M., and Venables, B. 2019. *ggplot2: various R*  
614 *programming tools for plotting data*. R package version 3.0.1.1.
- 615 Wickham, H. 2009. *ggplot2: elegant graphics for data analysis*. Springer-Verlag, New York.
- 616 Wickham, H. 2007. Reshaping data with the reshape package. *J. Stat. Softw.* 21:1–20
- 617 Wickham, H. 2011. The split-apply-combine strategy for data analysis. *J. Stat. Softw.* 40:1–29
- 618 Wilke, C. O. 2017. *cowplot: Streamlined plot theme and plot annotations for “ggplot2”*. R package  
619 version 0.9.2.
- 620 Wu, C. A., Lowry, D. B., Cooley, A. M., Wright, K. M., Lee, Y. W., and Willis, J. H. 2008. *Mimulus* is  
621 an emerging model system for the integration of ecological and genomic studies. *Heredity (Edinb)*.  
622 100:220–230
- 623 Xue, P., Carrillo, Y., Pino, V., Minasny, B., and McBratney, A. B. 2018. Soil properties drive microbial



624 community structure in a large scale transect in south eastern Australia. *Sci. Rep.* 8:1–11

625 Zhalnina, K., Louie, K. B., Hao, Z., Mansoori, N., da Rocha, U. N., Shi, S., Cho, H., Karaoz, U., Loqué,

626 D., Bowen, B. P., Firestone, M. K., Northen, T. R., and Brodie, E. L. 2018. Dynamic root exudate

627 chemistry and microbial substrate preferences drive patterns in rhizosphere microbial community

628 assembly. *Nat. Microbiol.* 3:470–480

629 Zhang, F., Romheld, V., and Marschner, H. 1991. Release of zinc mobilizing root exudates in different

630 plant species as affected by zinc nutritional status. *J. Plant Nutr.* 14:675–686

631

632

633

634

635

636

637

638

639

640

641

642

643

644

645

646

647

648

649

650 **Figures and Tables**

651

652

653

654

655

656

657

658

659

660

661

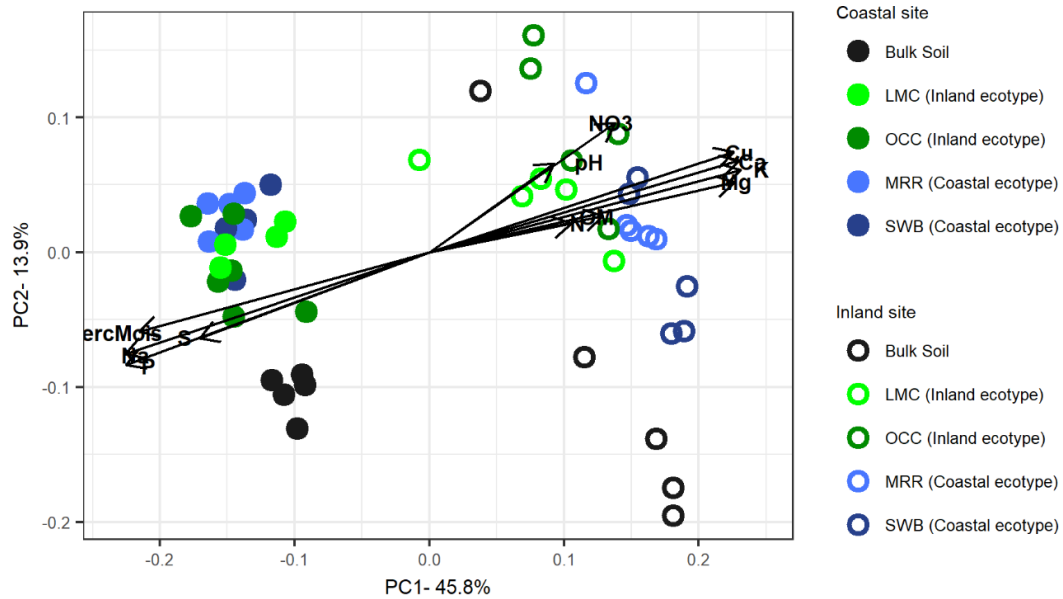

662 **Figure 1.** Principal coordinates analysis based on weighted UniFrac distances of bacterial and archaeal  
663 community structure. The strength of statistically significant ( $p < 0.05$ ) explanatory variables are shown  
664 with solid arrows.

665

666

667

668

669

670

671

672

673

674

675

676  
677  
678  
679  
680  
681  
682  
683  
684  
685  
686  
687  
688  
689  
690  
691  
692  
693  
694  
695  
696  
697  
698  
699  
700

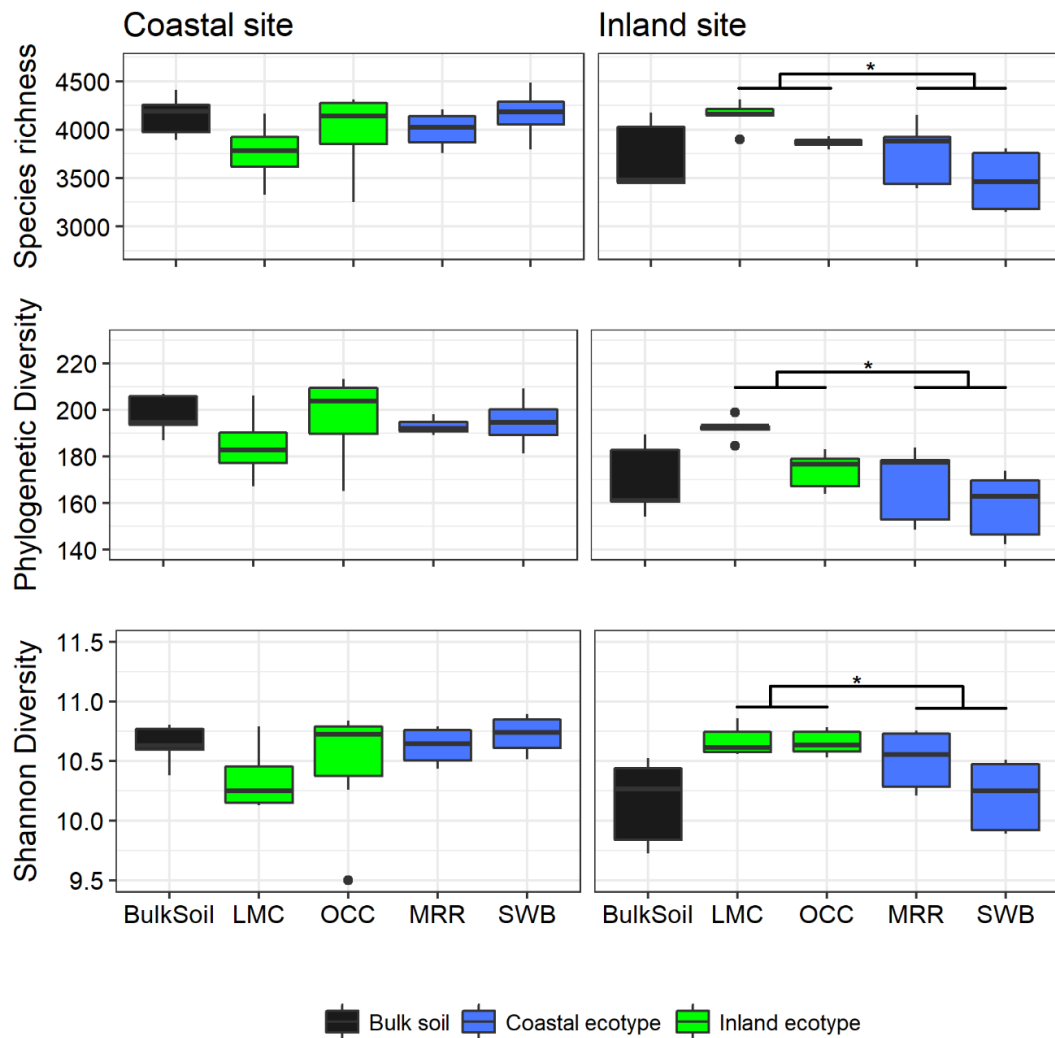

**Figure 2.** Metrics of alpha diversity in bulk soil and rhizosphere of coastal (genotypes MRR and SWB pooled) and inland (genotypes LMC and OCC pooled) ecotypes of *Mimulus guttatus* planted in two environments. Instances where ecotypes significantly differ are indicated with an asterisk (\*).

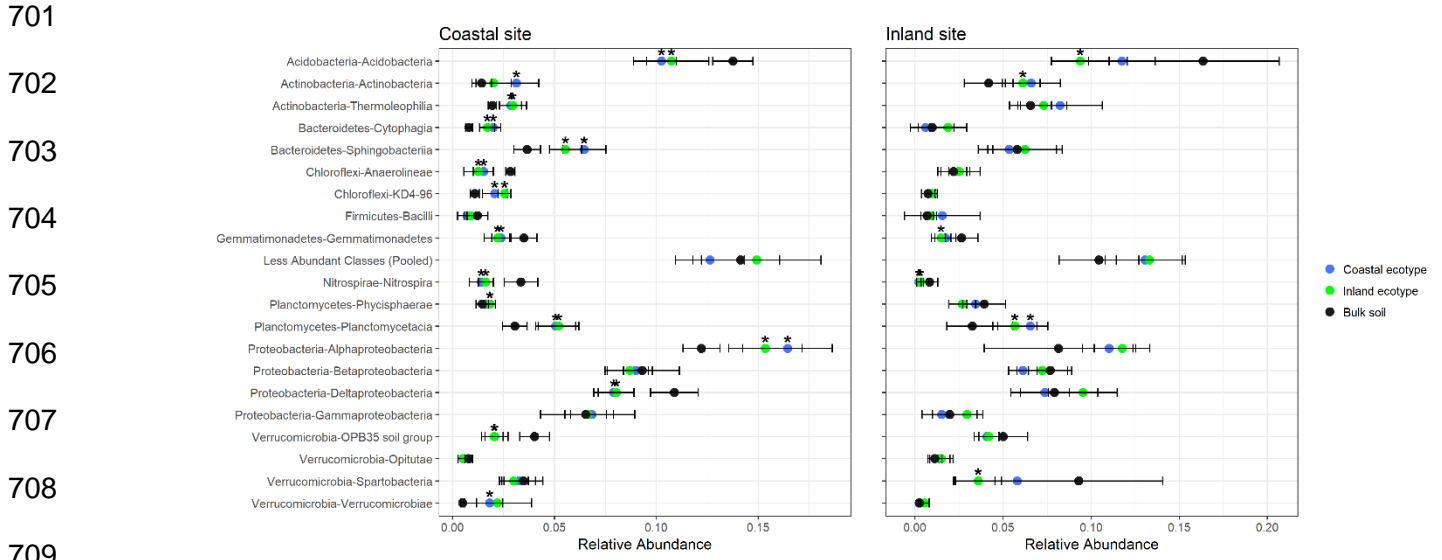

710 **Figure 3.** Relative abundance (mean  $\pm$  SD) of the top 20 most abundant bacterial and archaeal classes in  
711 bulk soil and rhizosphere communities of *Mimulus guttatus* planted in two environments. Less abundant  
712 taxa were pooled into a single group (“Less Abundant Classes”). Taxa which significantly differed  
713 between a specific ecotype and bulk soil are indicated by an asterisk.

714

715

716

717

718

719

720

721

722

723

724

725

726

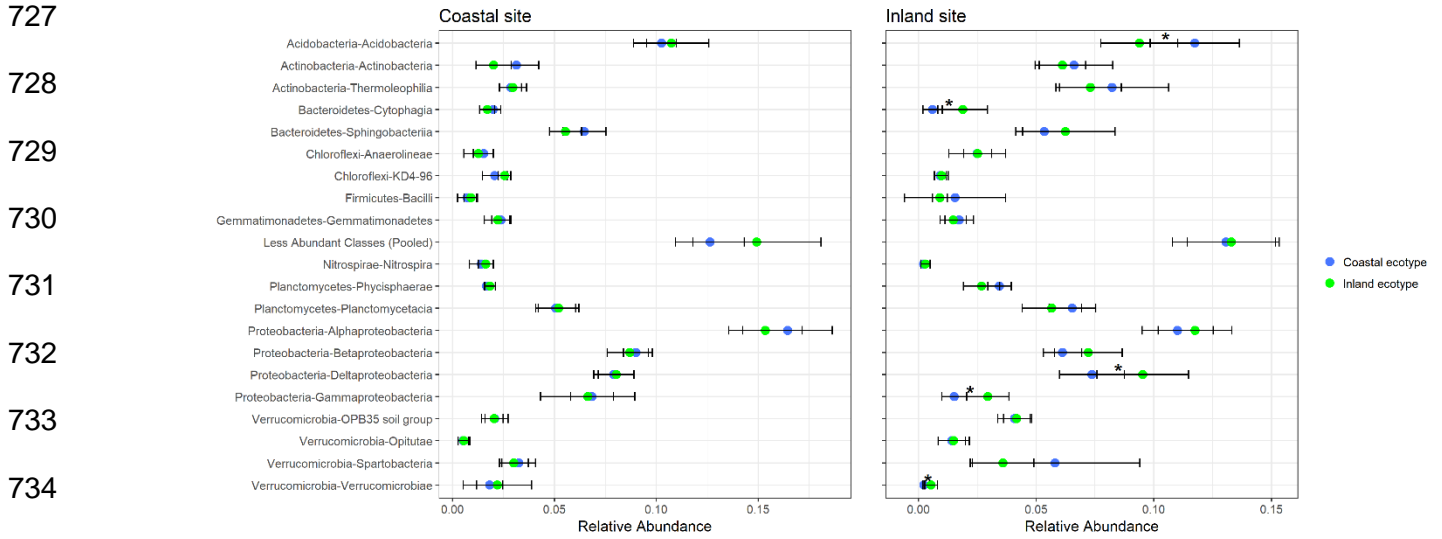

735

736 **Figure 4.** Relative abundance (mean  $\pm$  SD) of the top 20 most abundant bacterial and archaeal classes in  
 737 the rhizospheres of coastal (genotypes MRR and SWB pooled) and inland (genotypes LMC and OCC  
 738 pooled) ecotypes of *Mimulus guttatus* planted in two environments. Less abundant taxa were pooled into  
 739 a single group (“Less Abundant Classes”). Taxa which significantly differed between ecotypes at a given  
 740 site are indicated by an asterisk.

741

742

743

744

745

746

747

748

749

750

751

752

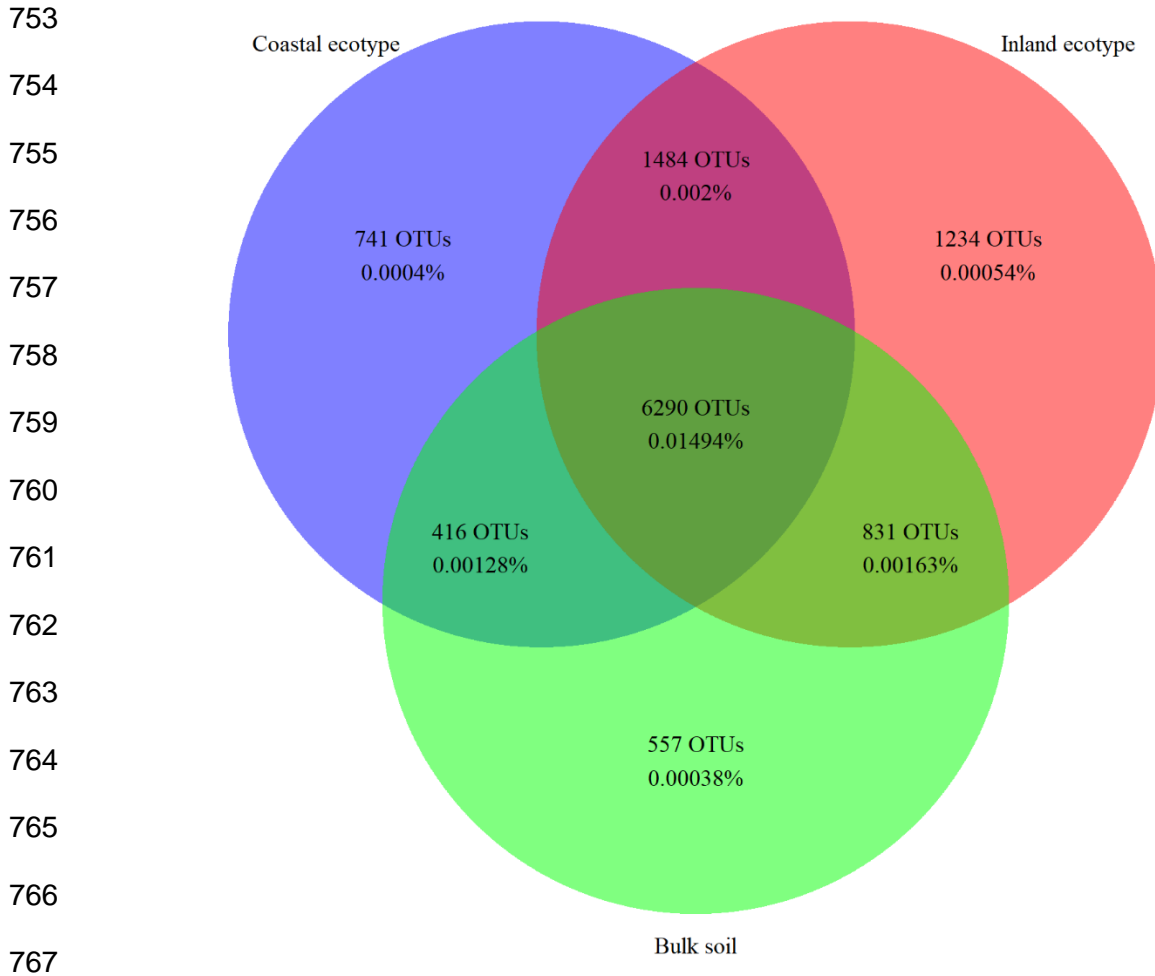

768 **Figure 5.** Presence/absence and relative abundance of microbial OTUs in each ecotype rhizosphere and  
769 bulk soil at the inland site. Labels indicate the number of OTUs unique to a given set, as well as the mean  
770 relative abundance of those OTUs across the full dataset.

771  
772  
773  
774  
775  
776  
777  
778

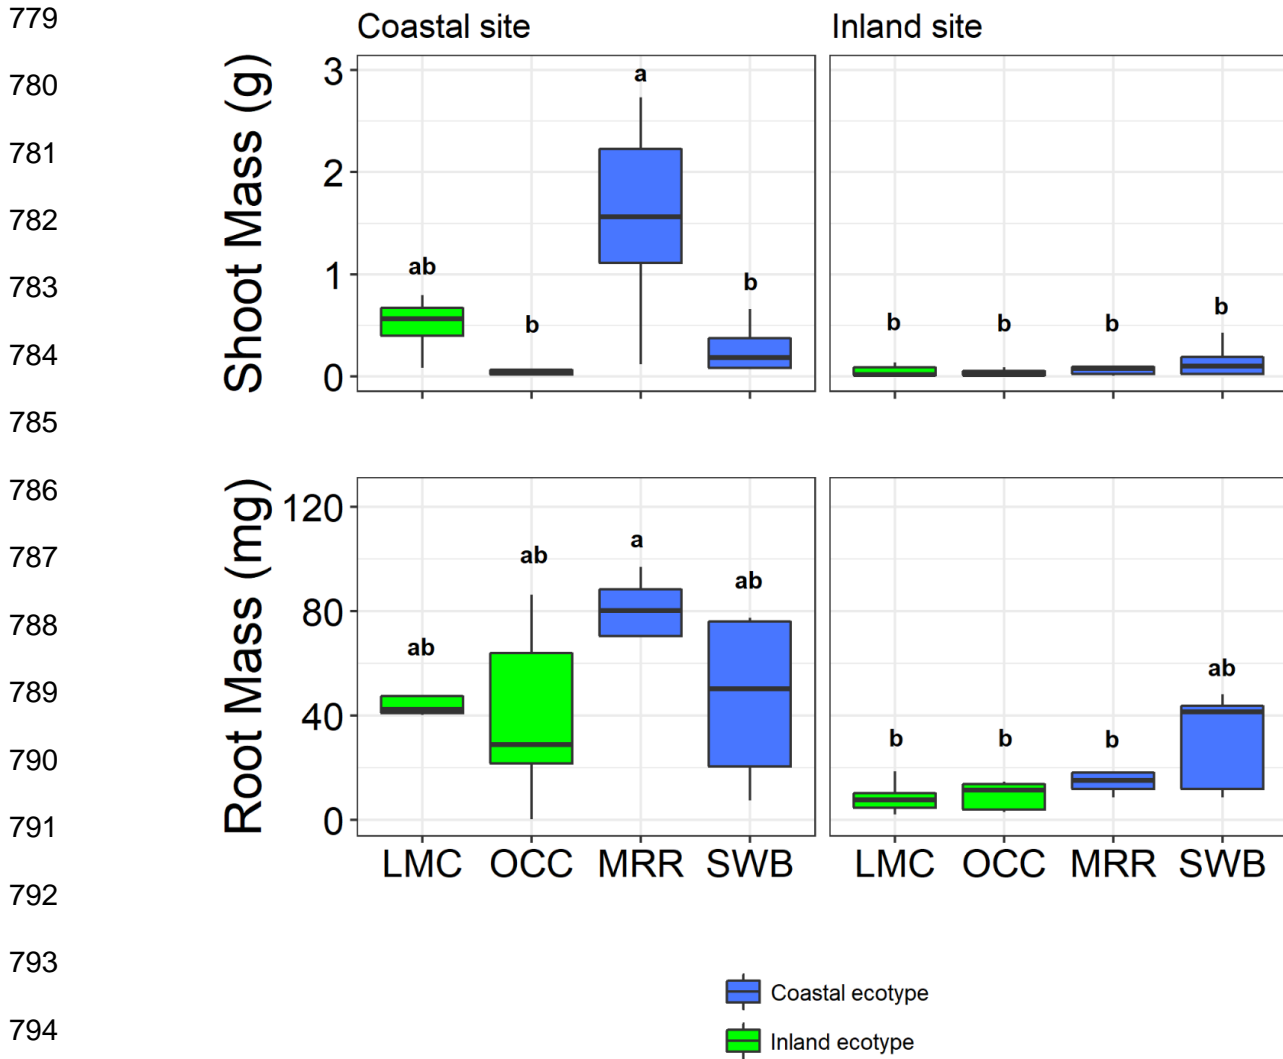

796 **Supplementary Figure 1.** Shoot and root biomass of coastal (MRR, SWB) and inland (LMC, OCC)  
797 genotypes of *Mimulus guttatus* planted in two environments. For shoot and root biomass, genotypes that  
798 significantly differed are indicated by a different letter above the boxplot.

799  
800  
801  
802  
803  
804

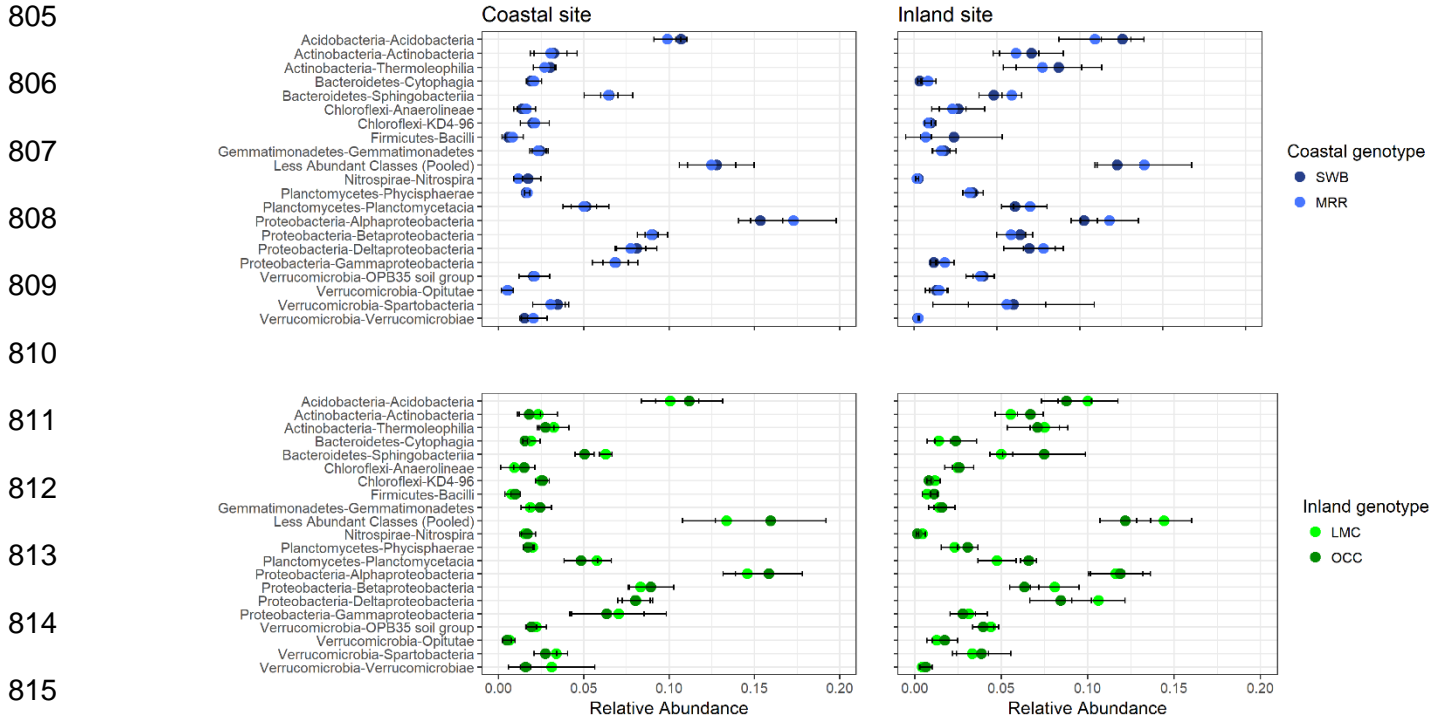

816 **Supplementary Figure 2.** Relative abundance (mean  $\pm$  SD) of the top 20 most abundant bacterial and  
 817 archaeal classes in the rhizospheres of coastal (MRR, SWB) and inland (LMC, OCC) genotypes of  
 818 *Mimulus guttatus* planted in two environments. Less abundant taxa were pooled into a single group  
 819 (“Less Abundant Classes”). None of the taxa depicted here significantly differed between genotypes at  
 820 either site.



| Soil Variable      | Coastal       | Inland         | p-value |
|--------------------|---------------|----------------|---------|
| pH                 | 6.08 (0.06)   | 6.16 (0.07)    | 0.3978  |
| Phosphorus (ppm)   | 17.4 (1.03)   | 3.4 (0.24)     | <0.001  |
| Potassium (ppm)    | 49.2 (4.14)   | 171.4 (7.31)   | <0.001  |
| Calcium (ppm)      | 788.2 (54.42) | 2518.4 (41.06) | <0.001  |
| Magnesium (ppm)    | 227.4 (8.8)   | 1603.8 (72.64) | <0.001  |
| Copper (ppm)       | 2.42 (0.18)   | 21.68 (1.15)   | <0.001  |
| Organic Matter (%) | 3.46 (0.26)   | 4.9 (0.48)     | 0.02891 |
| Sodium (ppm)       | 135.8 (7.62)  | 50.4 (1.21)    | <0.001  |
| Nitrate (ppm)      | 0.0 (0.0)     | 0.6 (0.23)     | 0.05966 |
| Ammonium (ppm)     | 5.26 (0.61)   | 5.64 (0.69)    | 0.6914  |
| Moisture (%)       | 34.24 (2.08)  | 17.82 (1.82)   | <0.001  |
| Total N (%)        | 0.1386 (0.02) | 0.1888 (0.02)  | 0.1067  |
| Sulfur (ppm)       | 23.6 (2.06)   | 17.4 (1.29)    | 0.03427 |

830

831 **Supplementary Table 1.** Soil characteristics (mean  $\pm$  SE) for bulk and rhizosphere soils collected from

832 *Mimulus guttatus* planted in two environments.

833
